# Supplementary material for: Loss of hierarchical imprinting regulation at the Prader–Willi/Angelman syndrome locus in human iPSCs
Source: PubMed Central journal article supplement — Hum Mol Genet. 2018 Aug 8;27(23):3999–4011. doi: 10.1093/hmg/ddy274 (PMC6240739; doi:10.1093/hmg/ddy274), 2018-08-08
Supplement: ddy274_supp.pdf [file ddy274_supp.pdf]

## **Supplementary material**

The supplementary material contains:

- Supplementary figures 1-3;
- Supplementary tables 1-4;
- Legends to the supplementary figures 1-3.

**A**

| Line   | Karyotype                                                                           |
|--------|-------------------------------------------------------------------------------------|
| Ctrl A | 46 XX                                                                               |
| Ctrl B | 46 XX                                                                               |
| Ctrl C | 46 XX, inv(6)/p23q13                                                                |
| Ctrl D | 46 XX                                                                               |
| Ctrl E | 46 XX                                                                               |
| AS A   | 46 XX                                                                               |
| AS B   | 46 XX (telomeric association between chr 13, 14, 15, 21 and 22 in 55% of the cells) |
| AS C   | n/d                                                                                 |
| AS D   | 46 XX                                                                               |
| AS E   | n/d                                                                                 |

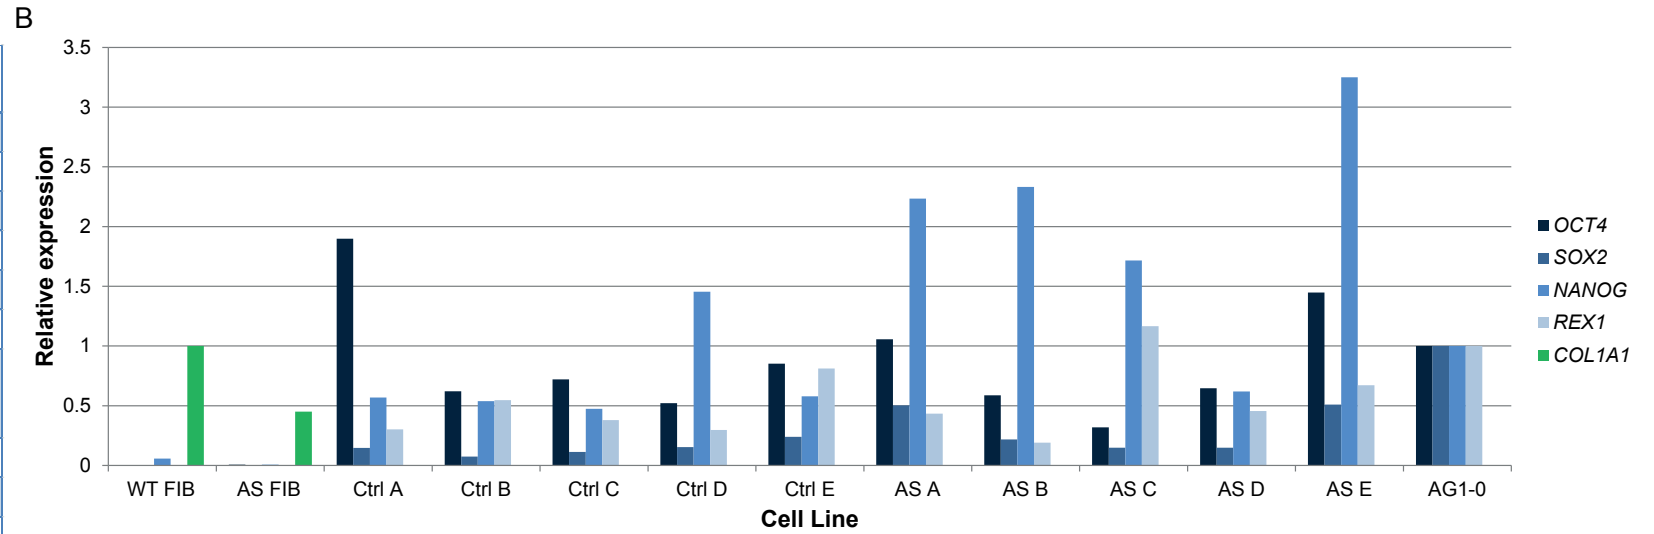

Suppl. Fig. 1

A

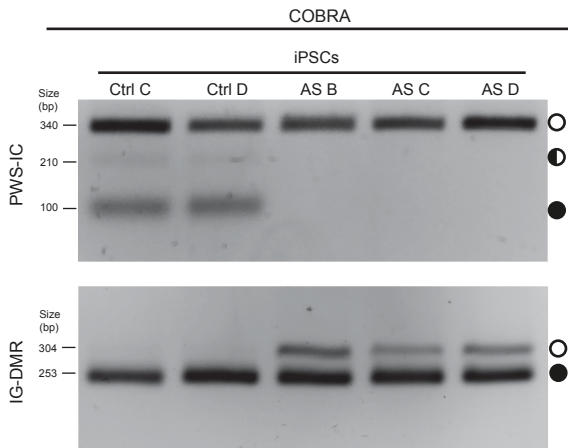

B

| Cell Line   | DNA methylation | SNRPN allelic status | SNORD116 allelic status | UBE3A allelic status |
|-------------|-----------------|----------------------|-------------------------|----------------------|
| IPSC Ctrl A | Unmeth/Meth     | Monoallelic          | n/d                     | n/d                  |
| IPSC Ctrl B | Unmeth/Unmeth   | Biallelic            | Biallelic               | Biallelic            |
| IPSC Ctrl C | Unmeth/Meth     | n/d                  | n/d                     | n/d                  |
| IPSC Ctrl D | Unmeth/Meth     | Monoallelic          | n/d                     | n/d                  |
| IPSC Ctrl E | Unmeth/Meth     | n/d                  | Monoallelic             | Biallelic            |
| IPSC AS A   | Unmeth/-        | n/d                  | n/d                     | n/d                  |
| IPSC AS B   | Unmeth/-        | n/d                  | n/d                     | n/d                  |
| IPSC AS C   | Unmeth/-        | n/d                  | n/d                     | n/d                  |
| IPSC AS D   | Unmeth/-        | Monoallelic          | n/d                     | n/d                  |
| IPSC AS E   | Unmeth/-        | Monoallelic          | Monoallelic             | Monoallelic          |

Suppl. Fig. 2

A

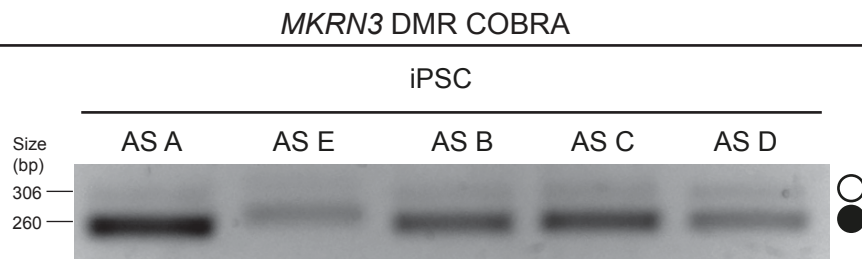

B

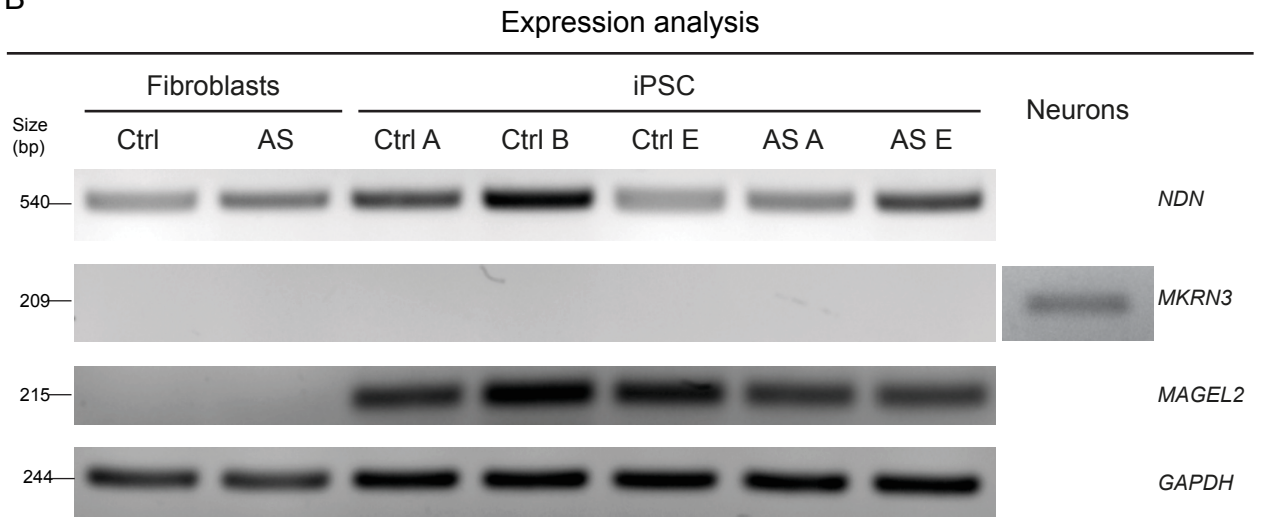

Suppl. Fig. 3

SUPPL. TABLE 1. Combined Bisulfite Restriction Analysis (COBRA) conditions for PWS-IC, IG-DMR, *NDN* and *MKRN3* DMR

| DMR         | Name                    | Sequence                               | PCR conditions                                                                                                         | Origin                                | COBRA expected sizes (in bp)                   |
|-------------|-------------------------|----------------------------------------|------------------------------------------------------------------------------------------------------------------------|---------------------------------------|------------------------------------------------|
| PWS-IC      | SNRPN DMR F1            | GGTTTTTTTTTATTGTAATAGTGTGGGG           | Nested PCR: 1st PCR: F1/R1: Tm 51°C 35 cycles; 2nd PCR: 5% of 1st PCR product, F2/R2 Tm 53°C, 25 cycles; BioTaq enzyme | Rugg-Gunn et al., 2007                | Uncut band: 340<br>Cut bands: 22, 93, 110, 115 |
|             | SNRPN DMR R1            | GGTTTTAGGGGTTTAGTAGTTTTTTTTTTTAG       |                                                                                                                        |                                       |                                                |
|             | SNRPN DMR F2            | CTCCAAAACAAAAACTTTAAAACCCAAA           |                                                                                                                        |                                       |                                                |
|             | SNRPN DMR R2            | CAATACTCCAAATCCTAAAAACTTAAAATATCTA     |                                                                                                                        |                                       |                                                |
| IG-DMR      | IG DMR F                | TTTTATTATTGAATTGGGTTTGTAGT             | Nested PCR: 1st PCR: F/R1: Tm 54°C 35 cycles; 2nd PCR: 5% of 1st PCR product, F/R2 Tm 54°C, 25 cycles; BioTaq enzyme   | Mo et al., 2015                       | Uncut band: 304<br>Cut bands: 33, 51, 253, 271 |
|             | IG DMR R1               | ACAATTCCTACTACAAAATTTCAACA             |                                                                                                                        |                                       |                                                |
|             | IGDMR R2                | TCCTACTACAAAATTTCAACAATAC              |                                                                                                                        | Customized                            | Uncut band: 306<br>Cut bands: 46, 260          |
| MKRN3 DMR F | GGAAGGAAAAAGAGATGTATATT | Tm 55°C, 35 cycles, Kapa Uracil enzyme |                                                                                                                        |                                       |                                                |
| MKRN3 DMR R | ACAAAAAATAACCAACC       |                                        | Tm 55°C, 35 cycles, Kapa Uracil enzyme                                                                                 | Uncut band: 282<br>Cut bands: 75, 207 |                                                |
| NDN DMR F   | AAGGTGGAGTGTTTTTTTTA    | Tm 55°C, 35 cycles, Kapa Uracil enzyme |                                                                                                                        |                                       |                                                |
| NDN DMR R   | ATAATACAAAAACATCCTCC    |                                        |                                                                                                                        |                                       |                                                |

Legend: DMR – Differentially Methylated Region; F – forward primer; R – reverse primer; PCR – Polymerase Chain Reaction; Tm – melting Temperature; bp – base pairs.

SUPPL. TABLE 2. Primers used for expression analysis

| Name     | Sequence                 | Origin                       | Experiments                                                                        | PCR Conditions (non-quantitative)         |
|----------|--------------------------|------------------------------|------------------------------------------------------------------------------------|-------------------------------------------|
| UBE3A F  | AGCCGGAATCTAGATTTCCA     | Ahmad et al., 2012           | RT-qPCR                                                                            |                                           |
| UBE3A R  | TGTCTGTGCCCGTTGTAAACT    |                              |                                                                                    |                                           |
| SNRPN F  | CTTCTGCCAGCTTGCAT        | Hogart et al., 2007          | RT-qPCR and allelic-specific expression analysis<br>(primer R used for sequencing) | Tm 55°C, 35 cycles, BioTaq enzyme         |
| SNRPN R  | TGAAGATTCGGCCATCTTGC     |                              |                                                                                    |                                           |
| NDN F    | GCCCGAATACGAGTTCTTTT     | MacDonald & Wevrick,<br>1997 | RT-PCR and allelic-specific expression analysis<br>(primer F used for sequencing)  | Tm 55°C, 35 cycles, NZYlong<br>polymerase |
| NDN R    | CACACATCATCAGTCCATA      |                              |                                                                                    |                                           |
| MKRN3 F  | GAAGCCGAGAGAGACAATGC     | Customized                   | RT-PCR                                                                             | Tm 60°C, 35 cycles, NZYlong<br>polymerase |
| MKRN3 R  | CCCCTGGAAGCATAATAGCA     |                              | RT-PCR                                                                             | Tm 60°C, 35 cycles, NZYlong<br>polymerase |
| MAGEL F  | AAAGCCAGCACAAAGCTGAT     |                              |                                                                                    |                                           |
| MAGEL R  | TTCCTGGTGTGTGTTCCA       |                              |                                                                                    |                                           |
| OCT4 F   | CTGAGGGCGAAGCAGGAGTC     | Jeziarski et al., 2010       | RT-qPCR                                                                            |                                           |
| OCT4 R   | CTTGGCAAATTGCTCGAGTT     |                              |                                                                                    |                                           |
| NANOG F  | GCAGAAGGCCTCAGCACCTA     |                              |                                                                                    |                                           |
| NANOG R  | AGGTTCCCAGTCGGGTTCA      |                              |                                                                                    |                                           |
| SOX2 F   | ATGCACCGCTACGACGTGA      | Ginis et al., 2004           |                                                                                    |                                           |
| SOX2 R   | CTTTTGCACCCCTCCATTT      |                              |                                                                                    |                                           |
| REX1 F   | CAGATCCTAAACAGCTCGCAGAAT | Takahashi et al., 2007       |                                                                                    |                                           |
| REX1 R   | GCGTACGCAAATTAAGTCCAGA   |                              |                                                                                    |                                           |
| COL1A1 F | GAGGGCCAAGACGAAGACATC    | Hu et al., 2015              |                                                                                    |                                           |
| COL1A1 R | CAGATCACGTCATCGACAAC     |                              |                                                                                    |                                           |
| GAPDH F  | GTCGTGGAGTCCACTGGCGTC    | Huiru et al., 2013           | RT-PCR and RT-qPCR                                                                 | Tm 60°C, 30 cycles, NZYlong<br>polymerase |
| GAPDH R  | TCATGAGTCCTCCACGATAC     |                              |                                                                                    |                                           |

Legend: DMR – Differentially Methylated Region; F – forward primer; R – reverse primer; PCR – Polymerase Chain Reaction; RT-qPCR – Reverse Transcription, quantitative PCR; RT-PCR – Reverse Transcription PCR; Tm – melting Temperature. BioTaq enzyme from Bioline and NZYlong polymerase from NZYTech.

SUPPL. TABLE 3. Sequence of Stellaris™ RNA FISH oligo probes

| Probe # | Probe Sequence       | Probe # | Probe Sequence       |
|---------|----------------------|---------|----------------------|
| 1       | ATGGAGTAGAGGTCTAACCT | 25      | GGCATGCAACATTGATTTCT |
| 2       | TGGACTACACAGGACATGGA | 26      | AAGTGTTTCTGGTACTTCGG |
| 3       | CGATCATCTCTAGCTAGTGA | 27      | CAGGGCTACTCTGATTTTTA |
| 4       | TACCAAATCCTTCTTTTGCT | 28      | CACACTCGTTGTAACACCA  |
| 5       | CATGATGTGTGATTCTGGGT | 29      | TCACACTGTGCTCTATGAGA |
| 6       | CCAAGTGTCCAATATACCA  | 30      | ACCTAGCAACCAGAAATGGT |
| 7       | CACAGGTCAGGAAAACCGTG | 31      | CTCTTCTCTAAAAGGGGCT  |
| 8       | TACCTATATTAAGCCCCAAG | 32      | AAGAAACACCCTGCTTCTTG |
| 9       | CGTAAGCAAGCTCAGTACT  | 33      | AATCATGAGGTTCTGCTTA  |
| 10      | TACCTTCAGTGGAAACCTTT | 34      | TTTGCTTGTTATGTTCTGGG |
| 11      | TATGCACACTCCTCACAATT | 35      | GAATATTTGGTAAGCTGCCT |
| 12      | CGTCGTCTTATGTATCTCTG | 36      | AGGAAGTCCAAGTTTTCTA  |
| 13      | TGATACTTCTACTGCCATCA | 37      | ACAATTCTCTGTTACAGCCA |
| 14      | TCTCATGTTCCAGGGAGAAA | 38      | CATGACTTTTTGCAGACACC |
| 15      | CTGAAGTTCATTTTAGGCA  | 39      | CAAAATCACACACCCTTTG  |
| 16      | TTCCTTGGAACCAAGAGCAA | 40      | GTGAGTTTGCTATTTGGGA  |
| 17      | GTTCAAGCTGACAATGGTGT | 41      | CGCCAAATGCAGGAGATTAC |
| 18      | GCCAAGTTACAACATCCATG | 42      | GGAACCTCTACATCTTTCTG |
| 19      | TTTCCTTGATCACTAGGAGT | 43      | AGTAGTAAGGGCATTGCTT  |
| 20      | GGAGGCCTTTTTTATATCAC | 44      | ACTTGAACCAGTCTTAGCAG |
| 21      | ATGGTCTTCACTATGCAAGC | 45      | AACTCCAGGAAGGTACGTG  |
| 22      | ATATCTGTACCACACGTACT | 46      | CTTAGAGCAATAGCCTTTGG |
| 23      | ATATTCATGCTTTATCCACC | 47      | CCACATACCACGACGAACAA |
| 24      | TGGTGGCATCGGGTAGAAAA | 48      | AGCACAGAGGTTGCTAAGAG |

SUPPL. TABLE 4. Antibodies for IF

| <b>Name</b>     | <b>Dilution</b> | <b>Supplier</b>                  |
|-----------------|-----------------|----------------------------------|
| $\alpha$ -SOX2  | 1:50            | R&Dsystems (MAB2018)             |
| $\alpha$ -NANOG | 1:100           | Affymetrix eBioscience (14-5768) |



**Suppl. Fig. 1 – Karyotype and stem cell marker characterization of all the isogenic Ctrl and AS iPSCs**

- A. Karyotype status of Ctrl and AS iPSCs.
- B. RT-qPCR analyses for the fibroblast marker (*COL1A1*) and the stem cell markers (*OCT4*, *SOX2*, *NANOG* and *REX1*) in only one representative sample for Ctrl and AS FIBs and all the generated isogenic Ctrl and AS iPSCs and the published AG1-0 iPSC line. Relative expression has been normalized to the *GAPDH* housekeeping gene; *COL1A1* RT-qPCR values were normalized to 1 for the Ctrl FIB sample, while *OCT4*, *SOX2*, *NANOG* and *REX1* RT-qPCR values were normalized to 1 for the AG1-0 iPSC sample;

**Suppl. Fig. 2 – Characterization of the imprinting status of the chr15q11-q13 region in isogenic Ctrl and AS iPSCs**

- A. PWS-IC and IG-DMR COBRA for Ctrl C, Ctrl D, AS B, AS C and AS D iPSCs.  
White circle – unmethylated band; half black circle – partially methylated band; black circle – fully methylated band.
- B. Summary table of the imprinting analysis performed on the different isogenic Ctrl and AS iPSC lines.

**Suppl. Fig. 3 - Characterization of the imprinting status and expression analysis of genes at the proximal region of the chr15q11-q13 region in iPSCs**

- A. *MKRN3* DMR COBRA for all the isogenic AS iPSCs. White circle – unmethylated band; black circle – methylated band.

B. RT-PCR expression analysis of the *NDN*, *MKRN3* and *MAGEL2* in Ctrl and AS FIBs, several isogenic iPSCs lines and brain cortex (neurons).
